# Supplementary material for: Potential Impact of Influenza A/H1N1 Pandemic and Hand-Gels on Acute Diarrhea Epidemic in France
Source: PubMed Central journal article supplement (PMC3790785; doi:10.1371/journal.pone.0075226), 2013-10-04
Supplement: pone.0075226.s001.pdf [file pone.0075226.s001.pdf]

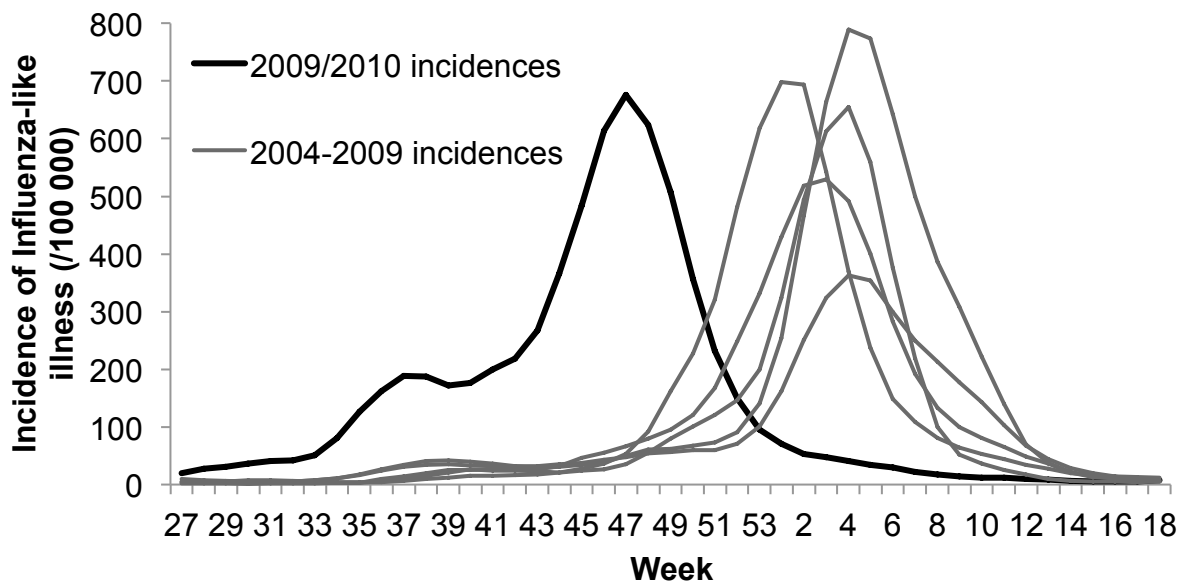

**Figure S1: Incidences of influenza-like illness in 2009-2010 and in the previous year (2004-2009) for France.** Observed incidences of influenza in 2009-2010 (black lines) arrived sooner than previous years. The plot shows smoothed data.
