# Supplementary material for: Potential Impact of Influenza A/H1N1 Pandemic and Hand-Gels on Acute Diarrhea Epidemic in France
Source: PubMed Central journal article supplement (PMC3790785; doi:10.1371/journal.pone.0075226), 2013-10-04
Supplement: pone.0075226.s002.pdf [file pone.0075226.s002.pdf]

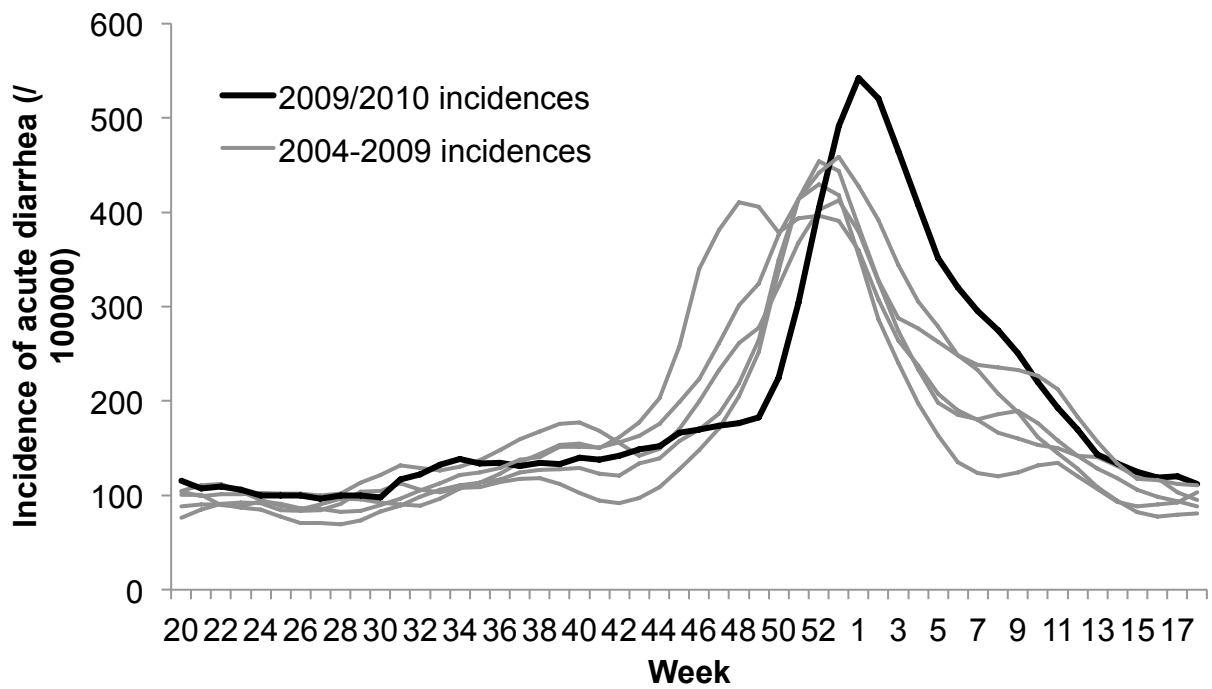

**Figure S2: Incidences of acute diarrrhea in 2009-2010 and in the previous year (2004-2009) in France.** Observed incidence of acute diarrrhea in 2009-2010 (black line) peaks later and higher than the incidence from previous years. The plot shows smoothed data.
