# Supplementary material for: Potential Impact of Influenza A/H1N1 Pandemic and Hand-Gels on Acute Diarrhea Epidemic in France
Source: PubMed Central journal article supplement (PMC3790785; doi:10.1371/journal.pone.0075226), 2013-10-04
Supplement: pone.0075226.s004.pdf [file pone.0075226.s004.pdf]

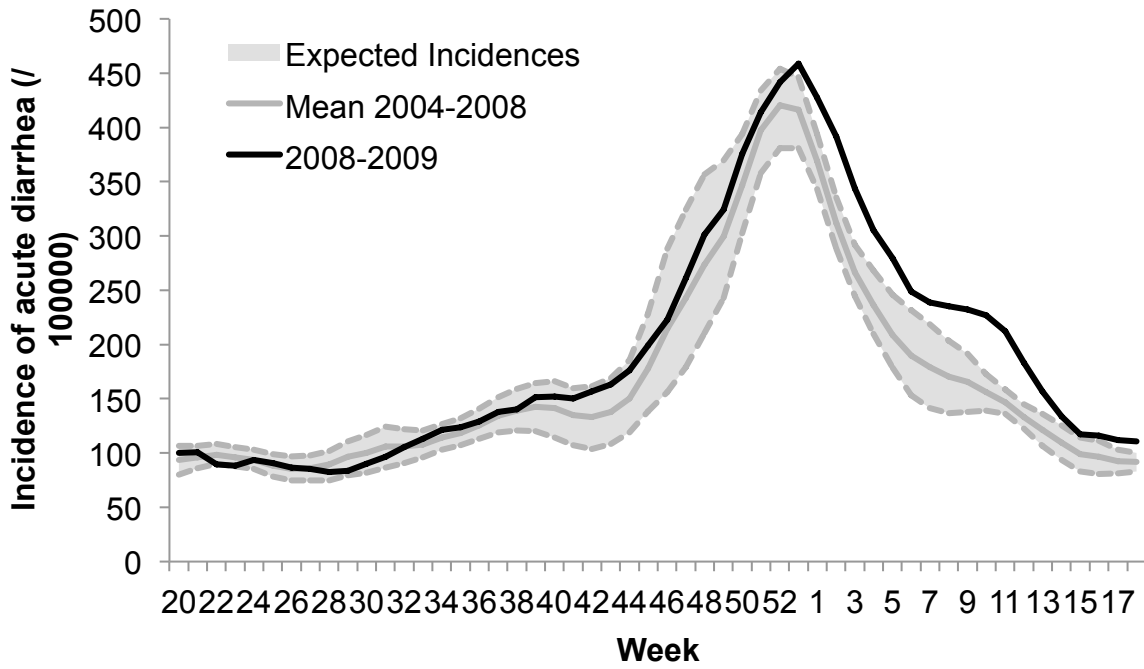

**Figure S4: Incidences of acute diarrhea in 2008-2009 for France.** Observed incidences are shown with black lines while expected incidences are shown with gray lines along their 95% confidence interval in dashed lines. Expected incidences are based on 2004-2008 data. The comparison shows that estimations of the 2008-2009 incidences are consistent with observations. The plot shows smoothed data.
